## Erratum

# Grandparents Raising Grandchildren: What Have We Learned Over the Past Decade?

Bert Hayslip Jr, PhD,<sup>1,\*</sup> Christine A. Fruhauf, PhD,<sup>2</sup> and Megan L. Dolbin-MacNab, PhD<sup>3</sup>

<sup>1</sup>Department of Psychology, University of North Texas, Denton. <sup>2</sup>Department of Human Development and Family Studies, Colorado State University, Ft. Collins. <sup>3</sup>Department of Human Development, Virginia Tech, Blacksburg.

\*Address correspondence to: Bert Hayslip Jr, PhD, Department of Psychology, University of North Texas, 1155 Union Circle #311280, Denton, TX 76203. E-mail: [BertHayslip@my.unt.edu](mailto:BertHayslip@my.unt.edu)

In the article “Grandparents Raising Grandchildren: What Have We Learned Over the Past Decade?,” DOI: 10.1093/geront/gnx106, Bert Hayslip’s correspondence address was listed incorrectly. The correct correspondence address is:

\*Address correspondence to: Bert Hayslip Jr, PhD, Department of Psychology, University of North Texas, 1155 Union Circle #311280, Denton, TX 76203. E-mail: [BertHayslip@my.unt.edu](mailto:BertHayslip@my.unt.edu)

The original article has now been corrected.
